# Supplementary material for: Genetic Regulation of Liver Metabolites and Transcripts Linking to Biochemical-Clinical Parameters
Source: Front Genet. 2019 Apr 17;10:348. doi: 10.3389/fgene.2019.00348 (PMC6478805; doi:10.3389/fgene.2019.00348)
Supplement: Supplementary file 2 [file Table_1.XLSX]

## Sheet: Tabelle1
Genetic regulation of liver metabolites and transcripts linking to biochemical-clinical parameters
Siriluck Ponsuksili1, Nares Trakooljul2, Frieder Hadlich1, Karen Methling3, Michael Lalk3, Eduard Murani2, and Klaus Wimmers2,4*
1 Leibniz Institute for Farm Animal Biology (FBN), Institute for Genome Biology, Functional Genome Analysis Research Unit, Wilhelm-Stahl-Allee 2, D-18196 Dummerstorf, Germany
2 Leibniz Institute for Farm Animal Biology (FBN), Institute for Genome Biology, Genomics Research Unit, Wilhelm-Stahl-Allee 2, D-18196 Dummerstorf, Germany
3 Institute for Biochemistry – Metabolomics, University of Greifswald, Felix-Hausdorff-Str. 4, 17487, Greifswald, Germany
4 Faculty of Agricultural and Environmental Sciences, University Rostock, 18059 Rostock, Germany
*Corresponding author: wimmers@fbn-dummerstorf.de
Supplementary Table 1
Pathways revealed from enrichment analysis (FDR<5%) of 74 liver porcine metabolites
Metabolite Set	Total	Hits	P value	FDR	Metabolite contain in the pathways *
PROTEIN BIOSYNTHESIS	19	16	2.14e-16	1.71e-14	L-Glutamic acid; L-Tyrosine; L-Phenylalanine; L-Alanine; L-Proline; L-Threonine; L-Asparagine; L-Isoleucine; L-Histidine; L-Lysine; L-Aspartic acid; L-Arginine; L-Cysteine; L-Glutamine; L-Leucine; L-Methionine; L-Valine; L-Tryptophan; D-Serine
GLUCONEOGENESIS	27	14	6.47e-10	2.59e-08	D-Glucose; Fructose 6-phosphate; L-Lactic acid; Oxoglutaric acid; Oxalacetic acid; Pyruvic acid; Phosphoenolpyruvic acid; Beta-D-Glucose; Adenosine triphosphate; L-Malic acid; 3-Phosphoglyceric acid; NAD; Fructose 1,6-bisphosphate; D-Glyceraldehyde 3-phosphate; Guanosine diphosphate; Glyceric acid 1,3-biphosphate; Guanosine triphosphate; 2,3-Diphosphoglyceric acid; ADP; Glucose 6-phosphate; Dihyd…
GLYCOLYSIS	21	12	2.95e-09	7.87e-08	D-Glucose; Fructose 6-phosphate; Pyruvic acid; Phosphoenolpyruvic acid; Beta-D-Glucose; Adenosine triphosphate; 3-Phosphoglyceric acid; NAD; Fructose 1,6-bisphosphate; D-Glyceraldehyde 3-phosphate; Glyceric acid 1,3-biphosphate; 2,3-Diphosphoglyceric acid; ADP; Glucose 6-phosphate; Dihydroxyacetone phosphate; NADH; Glucose 1-phosphate; Water; Alpha-D-Glucose; 2-Phospho-D-glyceric acid; Beta-D-Glu…
AMMONIA RECYCLING	18	11	5.51e-09	1.1e-07	Ammonia; Glycine; L-Glutamic acid; L-Asparagine; L-Histidine; L-Serine; L-Aspartic acid; Oxoglutaric acid; Pyruvic acid; Urocanic acid; Adenosine triphosphate; L-Glutamine; NAD; Carbamoylphosphate; ADP; NADH; Carbon dioxide; Water
CITRIC ACID CYCLE	23	11	1.72e-07	2.75e-06	cis-Aconitic acid; Citric acid; Fumaric acid; L-Malic acid; Isocitric acid; Oxoglutaric acid; Oxalacetic acid; Pyruvic acid; Succinic acid; Adenosine triphosphate; Hydrogen carbonate; NAD; Succinyl-CoA; FADH; Guanosine diphosphate; Acetyl-CoA; FAD; Guanosine triphosphate; ADP; Coenzyme A; NADH; Carbon dioxide; Water
UREA CYCLE	20	10	3.98e-07	5.31e-06	Adenosine monophosphate; Ammonia; Argininosuccinic acid; Fumaric acid; L-Glutamic acid; L-Alanine; L-Aspartic acid; Oxoglutaric acid; Ornithine; Oxalacetic acid; Pyruvic acid; Urea; L-Arginine; Adenosine triphosphate; Hydrogen carbonate; L-Glutamine; Citrulline; Carbamoylphosphate; ADP; Water
RNA TRANSCRIPTION	9	6	1.22e-05	0.00014	Adenosine monophosphate; Cytidine triphosphate; Cytidine monophosphate; Pyrophosphate; Uridine triphosphate; Uridine 5'-monophosphate; Adenosine triphosphate; Guanosine triphosphate; Guanosine monophosphate
MITOCHONDRIAL ELECTRON TRANSPORT CHAIN	15	7	4.84e-05	0.000484	Glycerol 3-phosphate; Fumaric acid; Succinic acid; Adenosine triphosphate; NAD; Ubiquinol; Coenzyme Q10; D-Glyceraldehyde 3-phosphate; Glyceric acid 1,3-biphosphate; ADP; Hydrogen; Oxygen; Dihydroxyacetone phosphate; NADH; Water
GLUCOSE-ALANINE CYCLE	12	6	0.000111	0.000991	Ammonia; D-Glucose; L-Glutamic acid; L-Alanine; Oxoglutaric acid; NADP; NADPH; Pyruvic acid; NAD; NADH; Pyridoxal 5'-phosphate; Water
PURINE METABOLISM	45	11	0.000326	0.00261	Adenine; Adenosine monophosphate; Adenosine; Cyclic AMP; Deoxyinosine; Deoxyguanosine; Deoxyadenosine; Guanine; Guanosine; Hypoxanthine; Inosinic acid; Inosine triphosphate; Inosine; Phosphoribosyl pyrophosphate; Uric acid; Xanthine; Xanthosine; Adenylsuccinic acid; Adenosine triphosphate; L-Glutamine; SAICAR; Deoxyadenosine monophosphate; dGDP; 2'-Deoxyguanosine 5'-monophosphate; 5-Phosphoribosy…
INTRACELLULAR SIGNALLING THROUGH PROSTACYCLIN RECEPTOR AND PROSTACYCLIN	6	4	0.000443	0.00301	Cyclic AMP; Adenosine triphosphate; Guanosine diphosphate; Guanosine triphosphate; Prostaglandin I2; ADP
GLUTATHIONE METABOLISM	10	5	0.000451	0.00301	Cysteinylglycine; Glycine; Glutathione; L-Glutamic acid; NADP; NADPH; Pyroglutamic acid; L-Cysteine; Gamma-Glutamylcysteine; Oxidized glutathione
PYRIMIDINE METABOLISM	36	9	0.00103	0.00631	Deoxyuridine; Deoxycytidine; Ureidopropionic acid; Beta-Alanine; Dihydrouracil; Dihydrothymine; Cytidine triphosphate; Cytidine; Cytidine monophosphate; Orotidylic acid; Orotic acid; Thymine; Thymidine; Phosphoribosyl pyrophosphate; Uridine triphosphate; Uridine 5'-monophosphate; Uridine 5'-diphosphate; Uridine; Uracil; L-Glutamine; Ureidosuccinic acid; dCTP; dUDP; Carbamoylphosphate; Deoxyuridin…
GLUTAMATE METABOLISM	18	6	0.00154	0.00879	Ammonia; Gamma-Aminobutyric acid; Glutathione; L-Glutamic acid; Oxoglutaric acid; Succinic acid; L-Glutamine; NAD; Gamma-Glutamylcysteine; N-Acetyl-D-Glucosamine 6-Phosphate; Carbamoylphosphate; 5-Phosphoribosylamine; Glucosamine 6-phosphate; Succinic acid semialdehyde; 1-Pyrroline-5-carboxylic acid; Guanosine monophosphate; Oxidized glutathione; Chitin
INTRACELLULAR SIGNALLING THROUGH FSH RECEPTOR AND FOLLICLE STIMULATING HORMONE	4	3	0.00169	0.00903	Cyclic AMP; Adenosine triphosphate; Guanosine diphosphate; Guanosine triphosphate
INSULIN SIGNALLING	19	6	0.00211	0.0106	Adenosine monophosphate; Cyclic AMP; D-Glucose; Palmitic acid; Oxalacetic acid; Pyruvic acid; Uridine diphosphate glucose; CE(16:0); Guanosine diphosphate; Acetyl-CoA; Guanosine triphosphate; Coenzyme A; Carbon dioxide; Amylose; TG(16:0/16:0/16:0)[iso]; DG(16:0/16:0/0:0); PIP2(16:0/16:0); PIP3(16:0/16:0); MG(0:0/16:0/0:0)
EXCITATORY NEURAL SIGNALLING THROUGH 5-HTR 4 AND SEROTONIN	5	3	0.004	0.0152	Cyclic AMP; Serotonin; Adenosine triphosphate; Guanosine diphosphate; Guanosine triphosphate
CORTICOTROPIN ACTIVATION OF CORTISOL PRODUCTION	5	3	0.004	0.0152	Cyclic AMP; Cortisol; Adenosine triphosphate; Guanosine diphosphate; Guanosine triphosphate
PENTOSE PHOSPHATE PATHWAY	18	5	0.00938	0.0341	Fructose 6-phosphate; Gluconolactone; Phosphoribosyl pyrophosphate; D-Ribose; D-Ribulose 5-phosphate; Xylulose 5-phosphate; Deoxyribose 5-phosphate; Fructose 1,6-bisphosphate; D-Sedoheptulose 7-phosphate; D-Glyceraldehyde 3-phosphate; 6-Phosphogluconic acid; D-Erythrose 4-phosphate; Deoxyribose 1-phosphate; Glucose 6-phosphate; Ribose 1-phosphate; D-Ribose 5-phosphate; Carbon dioxide; Beta-D-Gluc…
* the porcine liver metabolites which were found in the pathways were lebeled with red colour
